# Supplementary material
Source: HighWire-hosted journal article supplement (https://www.jneurosci.org/content/41/14/3120)
Supplement: inline-supplementary-material-2 [file inline-supplementary-material-2.xlsx]

## Sheet: Fig. 1K
Figure 1 - Source Data
Levels of the extracellular (EC) trkB domain [a.u.] (Panel K left)								Levels of the intracellular (IC) trkB domain [a.u.] (Panel K middle)								IC/EC ratio (Panel K right)
	eYFP	trkB.DN			eYFP	trkB.DN			eYFP	trkB.DN			eYFP	trkB.DN			eYFP	trkB.DN			eYFP	trkB.DN
	1334521	1316804		Number of neurons	74	99			582705	957007		Number of neurons	74	99			0.43664	0.726764		Number of neurons	74	99
	2331838	1920209		Number of mice	4	5			1130648	1093782		Number of mice	4	5			0.484874	0.569616		Number of mice	4	5
	1952955	1963488		Minimum	308964	774089			1089416	1640578		Minimum	15552	15935			0.557829	0.835543		Minimum	0.01649	0.007929
	1297874	3027096		25% Percentile	1026001	1601414			940662	3229350		25% Percentile	304235	118030			0.724771	1		25% Percentile	0.2909	0.0597
	1030534	1111539		Median	1513858	2218257			950507	165309		Median	1099298	427043			0.922345	0.148721		Median	0.725	0.162
	1453248	1984138		75% Percentile	2071390	3048647			1865060	1190788		75% Percentile	2089654	829981			1	0.600154		75% Percentile	1	0.3198
	2052823	1350790		Maximum	3954743	9358572			3297306	493071		Maximum	9337320	8731818			1	0.365024		Maximum	1	1
	2345661	1421474							3296570	735111							1	0.517147
	2022307	2440567		Mean	1613709	2571727			1801956	2605620		Mean	1522892	675638			0.89104	1		Mean	0.6229	0.2476
	1392499	2188233		Std. Deviation	738568	1443273			1467357	674942		Std. Deviation	1651493	1026530			1	0.308442		Std. Deviation	0.3491	0.2541
	769036	1079940		Std. Error of Mean	85857	145054			267729	98460		Std. Error of Mean	191982	103170			0.348136	0.0911721		Std. Error of Mean	0.04058	0.02554
	1534525	1519879		Lower 95% CI of mean	1442597	2283872			1089339	226683		Lower 95% CI of mean	1140272	470900			0.709887	0.149146		Lower 95% CI of mean	0.5421	0.1969
	1493191	1040879		Upper 95% CI of mean	1784822	2859583			3177427	197117		Upper 95% CI of mean	1905511	880376			1	0.189375		Upper 95% CI of mean	0.7038	0.2983
	634322	1784450							320652	1613687							0.505504	0.904305
	769485	1763583		D'Agostino & Pearson normality test					250484	1523783		D'Agostino & Pearson normality test					0.325522	0.864027		D'Agostino & Pearson normality test
	1654189	2345799		K2	5.458	50.5			2918673	456389		K2	49.47	146			1	0.194556		K2	87.26	35.54
	738258	1295296		P value	0.0653	<0,0001			1109180	586253		P value	<0,0001	<0,0001			1	0.452601		P value	<0,0001	<0,0001
	827087	2092887		Passed normality test (alpha=0.05)?	Yes	No			918642	337677		Passed normality test (alpha=0.05)?	No	No			1	0.161345		Passed normality test (alpha=0.05)?	No	No
	670837	781548		P value summary	ns	****			163157	16504		P value summary	****	****			0.243214	0.0211169		P value summary	****	****
	860756	2597934							97488	949174							0.113259	0.365357
	1117432	2054054		Wilcoxon rank-sum test					87779	398841		Wilcoxon rank-sum test					0.0785543	0.194173		Wilcoxon rank-sum test
	661577	1170383		P value	<0,0001				71430	15935		P value	<0,0001				0.107969	0.0136148		P value	<0,0001
	473744	995173		One- or two-tailed P value?	Two-tailed				61179	23931		One- or two-tailed P value?	Two-tailed				0.12914	0.0240471		One- or two-tailed P value?	Two-tailed
	1259665	1045208		Sum of ranks	4746 , 10305				123906	57566		Sum of ranks	7833 , 7218				0.0983644	0.0550758		Sum of ranks	8647 , 6405
	748368	3143014		U value	1971				46874	850305		U value	2268				0.0626349	0.270538		U value	1455
	460819	2218257		95.01% CI of difference	455972 to 1021457				37496	105528		95.01% CI of difference	-883884 to -227231				0.0813678	0.0475723		95.01% CI of difference	-0,5489 to -0,2651
	1101873	3048647							377607	511550							0.342695	0.167796
	308964	2465986							92060	102143							0.297964	0.0414209
	1422651	2729749							1472042	300882							1	0.110223
	2561951	1796542							5023910	565908							1	0.314999
	1268576	1818666							2079667	377597							1	0.207623
	2122058	1702538							4867100	542393							1	0.318579
	2354115	2477253							6245238	500382							1	0.201991
	3954743	2591375							9337320	749222							1	0.289122
	1685181	2633072							2723194	102719							1	0.039011
	1657847	3625590							1473637	118030							0.888887	0.0325546
	935524	2959710							328927	176705							0.351596	0.0597036
	1661626	1540972							2119616	1793086							1	1
	2071267	1533843							3056190	576262							1	0.375698
	1916466	2171252							1399450	1985164							0.730224	0.914294
	1012400	2023208							304258	1007830							0.300531	0.498135
	884889	2150292							182169	307124							0.205867	0.142829
	1241707	2253371							1344840	240761							1	0.106845
	1197853	786965							735005	36983							0.613602	0.0469946
	1041770	1819847							241812	176337							0.232117	0.0968966
	1461634	1790493							1060025	63215							0.725233	0.035306
	2031124	3822223							3740900	76935							1	0.0201283
	1213221	1077463							1160845	74816							0.956829	0.0694368
	2741806	1070793							5334451	52589							1	0.0491123
	1143882	2792991							844516	627774							0.738289	0.224768
	1766226	3363631							355934	544916							0.201523	0.162002
	2509044	4031722							2026257	829981							0.807581	0.205863
	2744840	2389353							1485031	197481							0.541027	0.0826506
	2763667	3132605							2771511	252126							1	0.0804846
	1959706	6921866							1220817	538138							0.622959	0.0777447
	2566813	2817454							1576435	109403							0.614161	0.0388306
	1939435	1728422							2147794	165047							1	0.0954899
	2585343	1726028							1969182	201168							0.761671	0.11655
	2071758	2302828							1763446	495578							0.851183	0.215204
	2123756	2036809							2998851	236908							1	0.116313
	1774722	1681403							1540130	905537							0.867815	0.53856
	2337057	1171928							906448	233057							0.387859	0.198866
	2995883	1485159							2327194	449842							0.776797	0.302892
	1702122	1324331							1398618	197898							0.82169	0.149433
	1914304	1473116							304166	77731							0.158891	0.0527665
	3488086	1398014							2731226	20088							0.783016	0.014369
	1986734	1263793							364193	48899							0.183313	0.0386926
	2217015	774089							597746	39006							0.269617	0.0503893
	942999	1601414							15552	347754							0.0164918	0.217154
	1385985	3017765							182468	460956							0.131652	0.152747
	930789	3042686							90567	70520							0.0973014	0.0231769
	772860	2663985							360992	145370							0.467086	0.0545687
	1304961	6763379							222736	1764319							0.170684	0.260864
	1749716	4980742							628280	1138462							0.359076	0.228573
		9358572								8731818								0.933029
		3601860								1254887								0.3484
		2736750								1160188								0.423929
		2722795								115788								0.0425253
		5068543								2317046								0.457142
		5638049								1554461								0.275709
		2057904								59560								0.0289422
		2085438								806578								0.386766
		4857867								1836545								0.378056
		3514087								27863								0.007929
		4496963								622334								0.13839
		4870248								667197								0.136995
		3497554								400238								0.114434
		3642283								642278								0.176339
		1920535								146671								0.0763701
		4782004								815645								0.170566
		2244480								29265								0.0130387
		3395194								1334937								0.393184
		3002546								427043								0.142227
		2432140								777816								0.319807
		2517868								269441								0.107012
		5699259								1102312								0.193413
		3614409								66489								0.0183954
		2216564								212972								0.0960819
		3199114								728817								0.227818

## Sheet: Fig. 1M
Figure 1 - Source Data 1
PV fluorescence [a.u.] (Panel M left)									GABA fluorescence [a.u.] (Panel M right)
	eYFP	trkB.DN			eYFP	trkB.DN				eYFP	trkB.DN			eYFP	trkB.DN
	8492989	6046993		Number of neurons	62	68				3227030	575125		Number of neurons	62	68
	8669361	8374364		Number of mice	3	3				2142846	684407		Number of mice	3	3
	10178681	6513299		Minimum	1445660	2121613				3263226	1049934		Minimum	268363	157954
	8666895	10633926		25% Percentile	5543493	4696131				2589084	1912011		25% Percentile	983132	775285
	8451670	4449212		Median	6664233	6637549				2905107	1258095		Median	1.62582e+06	1.06287e+06
	8066338	4178177		75% Percentile	8246962	8437760				2124162	553348		75% Percentile	2.50727e+06	1.73451e+06
	8210622	4491603		Maximum	13251820	11914395				2592193	309483		Maximum	3495658	3525232
	4939800	9244131								762414	2156279
	8244326	5271763		Mean	6757864	6641059				2449906	1256716		Mean	1.7229e+06	1.29882e+06
	7408171	8693206		Std. Deviation	2179078	2343121				2673312	2115357		Std. Deviation	913749	704878
	4593235	2121613		Std. Error of Mean	276743	284145				1189126	1012166		Std. Error of Mean	116046	85479
	6809808	6438869		Lower 95% CI of mean	6204482	6073903				3193062	1854174		Lower 95% CI of mean	1.49085e+06	1.12821e+06
	1874111	9689001		Upper 95% CI of mean	7311246	7208215				268363	1353676		Upper 95% CI of mean	1.95495e+06	1.46944e+06
	3895651	7656012								503712	864063
	6809234	9843872		D'Agostino & Pearson normality test						1032957	1540762		D'Agostino & Pearson normality test
	4944551	8135223		K2	2.673	3.941				1676013	774503		K2	11.41	10.08
	5643912	8340024		P value	0.26	0.14				3336175	1730311		P value	0.0033	0.0065
	5643912	5289518		Passed normality test (alpha=0.05)?	Yes	Yes				3336175	316560		Passed normality test (alpha=0.05)?	No	No
	4501086	7720287		P value summary	ns	ns				3495658	1604196		P value summary	**	**
	6238143	3880311								2129783	729364
	8969273	3755975		Unpaired t test						2069022	712305		Wilcoxon rank-sum test
	6715794	8967002		P value	0.7696					2057722	157954		P value	0.0077
	1445660	8521159		One- or two-tailed P value?	Two-tailed					1748996	767597		One- or two-tailed P value?	Two-tailed
	9739371	6735399		t, df	t=0,2935, df=128					1644720	1598730		Sum of ranks	4630 , 3885
	9628489	6389431		95% confidence interval	-904280 to 670669					2951669	980755		U value	1539
	8519636	6925797								1896766	2807619		95.02% CI of difference	-667070 to -101716
	6787898	7688867								2360547	1735909
	5863133	10786943								1752873	3525232
	9107253	8978249								3052734	3135368
	5954031	6539698								3132917	2436028
	6612671	7608502								1406701	2211861
	6481690	6768677								2775239	1297189
	4245431	9531893								1606925	1587333
	5798693	8797440								1695863	1594239
	7663286	5143791								2480002	1448666
	7088012	3473171								1362978	539680
	3141403	11914395								835507	1923527
	8039167	5001955								997364	915672
	9333676	9685241								933738	2453297
	8254869	7927583								1054995	1241549
	7270612	5310170								1380638	1075813
	6323387	8379303								523964	980863
	9988470	4202623								1169083	1472721
	6228066	5054353								1014249	1502236
	4964245	3749563								1193294	641855
	5683173	5373285								664608	774540
	4736940	3343830								490730	473468
	11964647	8123072								572994	1956970
	7935691	10911973								1676647	1032599
	5399459	4594189								1582708	777520
	5657835	6766657								860340	2103459
	4953088	4243497								600888	1171935
	7300067	7030481								1149256	862646
	13251820	5524700								824458	588573
	7199127	8020910								503418	784198
	5739669	8457246								1095939	778249
	3837362	6424149								940437	894706
	6165847	8985294								3040372	722742
	5878123	9717967								1113645	1000469
	6898975	5476075								903256	2185099
	5591504	2436271								1699669	2195075
	4347535	2351826								1111690	2334173
		3190539									983319
		5330678									880598
		3356949									551202
		6804045									827848
		6162271									791009
		4117518									1255162
