# Supplementary material
Source: HighWire-hosted journal article supplement (https://www.jneurosci.org/content/41/14/3120)
Supplement: inline-supplementary-material-5 [file inline-supplementary-material-5.xlsx]

## Sheet: Figs. 4C,D
Figure 4 - Source Data
Spontaneous IPSC frequency [events/s] (Panel C)								Spontaneous EPSC frequency [events/s] (Panel D)
	eYFP	trkB.DN			eYFP	trkB.DN			eYFP	trkB.DN			eYFP	trkB.DN
	2.1587	0.0326		Number of neurons	15	14			2.4878	0.9169		Number of neurons	15	14
	3.1656	0.8185		Number of Mice	3	3			1.7452	0.1872		Number of Mice	3	3
	1.1913	1.9031		Minimum	0.2123	0.0109			0.7765	0.1066		Minimum	0	0
	1.2877	0.3098		25% Percentile	0.437	0.0605			0.1896	0.0416		25% Percentile	0.0288	0.0269
	1.0334	0.825952		Median	0.9129	0.37			0.0333	0.0435		Median	0.0843	0.0751
	0.2528	0.1857		75% Percentile	1.2636	0.8705			0.0843	0.0413		75% Percentile	0.7263	0.2917
	0.3227	3.4824		Maximum	3.7122	3.4824			0.3829	1.6366		Maximum	2.4878	1.6366
	0.4544	1.0155							0	0.1182
	0.818	0.0605		Mean	1.1814	0.7191			0.0084	0		Mean	0.4867	0.2857
	0.4312	0.0674		Std. Deviation	1.0499	0.9599			0.06	0.0269		Std. Deviation	0.7365	0.4693
	3.7122	0.4303							0.8828	0.5786
	0.9129	0.0109		Not normal according to DAgostino & Pearson Test					0.0273	0.0109		Not normal according to DAgostino & Pearson Test
	1.0954	0.0543		Wilcoxon rank-sum test P value:	0.0521				0.0465	0		Wilcoxon rank-sum test P value:	0.6153
	0.2123	0.8705		U:	150				0	0.2917		U:	117
	0.6719								0.5759

## Sheet: Figs. 4F-K
Figure 4 - Source Data
AP threshold [mV] (Panel F)								Time constant [ms] (Panel G)								Capacitance [pF] (Panel H)								Input resistance [MΩ] (Panel o)								AP downstroke [ms] (Panel q)								AP halfwidth [ms] (Panel p)
	eYFP	trkB.DN			eYFP	trkB.DN			eYFP	trkB.DN			eYFP	trkB.DN			eYFP	trkB.DN			eYFP	trkB.DN			eYFP	trkB.DN			eYFP	trkB.DN			eYFP	trkB.DN			eYFP	trkB.DN			eYFP	trkB.DN			eYFP	trkB.DN
	-30.48	-44.963		Number of neurons	14	19			3.826	11.52		Number of neurons	14	19			49.9769	80.6074		Number of neurons	14	19			76.56	142.91		Number of neurons	14	19			0.492	0.378		Number of neurons	14	19			0.205	0.233		Number of neurons	14	19
	-38.5836	-40.4091		Number of Mice	10	6			4.08333	6.89		Number of Mice	10	6			47.7441	82.4045		Number of Mice	10	6			85.53	83.61		Number of Mice	10	6			0.429	0.375		Number of Mice	10	6			0.188	0.186		Number of Mice	10	6
	-39.9159	-40.4663		Minimum	-43.3543	-46.6919			5.81471	7.95556		Minimum	3.826	6.5917			63.898	82.5668		Minimum	41.2577	60.4878			91	96.35		Minimum	60.1237	75.0046			0.427	0.449		Minimum	0.425	0.352			0.242	0.227		Minimum	0.188	0.186
	-35.6478	-45.5933		25% Percentile	-40.95	-45.1975			7.07	8.3875		25% Percentile	6.4833	7.9937			55.6206	78.2339		25% Percentile	49.4498	78.8273			127.11	107.21		25% Percentile	90.9341	84.2334			0.472	0.449		25% Percentile	0.44	0.3855			0.223	0.243		25% Percentile	0.223	0.2183
	-38.4109	-40.1681		Median	-38.5309	-42.8844			8.6	8.76		Median	7.3037	8.76			79.4467	65.7949		Median	63.1285	82.5668			108.25	133.14		Median	112.809	103.677			0.469	0.487		Median	0.4785	0.435			0.218	0.3		Median	0.256	0.233
	-32.0986	-38.6211		75% Percentile	-35.6478	-40.2284			9.16	6.59167		75% Percentile	8.6	11.3969			44.8055	84.0232		75% Percentile	73.1508	108.9			204.44	78.45		75% Percentile	154.387	133.638			0.637	0.427		75% Percentile	0.584	0.4627			0.327	0.242		75% Percentile	0.327	0.2625
	-38.4994	-35.7717		Maximum	-30.48	-35.7717			6.93571	7.85		Maximum	11.7	16.475			72.3956	60.4878		Maximum	138.049	138.837			95.8	129.78		Maximum	204.439	156.815			0.481	0.507		Maximum	0.637	0.507			0.266	0.223		Maximum	0.364	0.305
	-41.3615	-44.7083							8.3	12.8							138.049	89.9063							60.12	142.37							0.425	0.499							0.252	0.305
	-41.7384	-39.4867		Mean	-37.7998	-42.474			8.58571	10.79		Mean	7.5007	9.8478			73.1508	131.102		Mean	66.0947	92.0928			117.37	82.3		Mean	120.887	110.023			0.44	0.466		Mean	0.5025	0.4317			0.247	0.218		Mean	0.2694	0.2391
	-40.95	-45.6181		Std. Deviation	3.8225	3.045			11.7	8.10833		Std. Deviation	2.1931	2.6537			75.7838	108.105		Std. Deviation	24.2411	24.086			154.39	75		Std. Deviation	42.7007	27.6134			0.489	0.418		Std. Deviation	0.074	0.0457			0.285	0.235		Std. Deviation	0.0569	0.0345
	-38.5623	-41.305							6.49167	10.6083							71.3887	109.143							90.93	97.2							0.476	0.435							0.26	0.232
	-36.4849	-46.6919		Normal according to DAgostino & Pearson Test					10.4214	16.475		Normal according to DAgostino & Pearson Test					62.359	138.837		Not normal according to DAgostino & Pearson Test					167.12	118.66		Normal according to DAgostino & Pearson Test					0.603	0.399		Normal according to DAgostino & Pearson Test					0.36	0.219		Normal according to DAgostino & Pearson Test
	-33.11	-43.29		T - Test p-value:	0.0005				7.5375	11.0278		T - Test p-value:	0.0112				41.2577	72.1085		Wilcoxon rank-sum test					182.69	152.93		Unpaired t test					0.611	0.381		T - Test p-value:	0.0019				0.364	0.191		T - Test p-value:	0.0667
	-43.3543	-42.8844		t-stat:	3.9113				6.48333	7.05		t-stat:	-2.6968				49.4498	81.8835		P value	0.0009				131.11	86.1		P value	0.3815				0.584	0.352		t-stat:	3.3914				0.334	0.204		t-stat:	1.9006
		-46.0294								13.8167								88.1081		U:	41					156.81		t-stat:	0.8877					0.476								0.291
		-41.9542								8.96818								114.63								78.24								0.371								0.212
		-45.2757								8.44286								63.0988								133.8								0.453								0.269
		-39.3997								12.525								136.335								91.87								0.446								0.275
		-44.3691								8.54167								82.3874								103.68								0.435								0.237

## Sheet: Figs. 4M,O,P
Figure 4 - Source Data
Firing rate [spikes/s] (Panel m)								Maximum adaptation [%] (Panel o)								EPSP frequency [events/s] (Panel p)
	eYFP	trkB.DN			eYFP	trkB.DN			eYFP	trkB.DN			eYFP	trkB.DN			eYFP	trkB.DN			eYFP	trkB.DN
	152	81		Number of neurons	14	19			109.727	118.076		Number of neurons	13	19			0.156	3.444		Number of neurons	17	19
	316	259		Number of Mice	10	6			112.618	105.759		Number of Mice	10	6			0.748	0.839		Number of Mice	11	6
	273	156		Minimum	82	31			102.711	112.853		Minimum	93.02	98.63			0.737	0.436		Minimum	0.1351	0.2269
	214	124		25% Percentile	152	99.25			105.738	110.215		25% Percentile	100.65	110.03			1.252	2.08		25% Percentile	0.4145	0.6539
	230	111		Median	204	128			105.663	118.887		Median	105.66	114.99			0.608	3.82		Median	0.7367	1.3313
	196	212		75% Percentile	257	168.5			104.521	117.131		75% Percentile	110.36	121.79			0.45	0.592		75% Percentile	1.8323	3.0226
	273	167		Maximum	316	259			112.277	114.99		Maximum	120.12	134.36			2.456	1.331		Maximum	5.8243	4.5674
	257	128							120.122	134.356							5.824	2.605
	114	31		Mean	202.357	136.316			107.014	109.964		Mean	104.974	115.276			2.107	1.329		Mean	1.258	1.8555
	82	198		Std. Deviation	65.2163	55.4257			103.368	122.813		Std. Deviation	7.9788	8.78384			0.81	1.378		Std. Deviation	1.3992	1.3269
	177	130							93.4231	107.206							0.713	0.227
	151	64		Normal according to DAgostino & Pearson Test					93.0171	124.846		Normal according to DAgostino & Pearson Test					0.709	3.268		Not normal according to DAgostino & Pearson Test
	212	96		T - Test p-value:	0.0037				94.4568	125.306		T - Test p-value:	0.002				2.386	3.031		Wilcoxon rank-sum test P value:	0.0931
	186	195		t-stat:	3.1393					98.6315		t-stat:	-3.3788				0.135	1.158		U:	108
		95								101.133		1 neurons in eYFP group removed as outlier					1.741	4.567
		148								116.421							0.307	1.089
		169								122.755							0.246	0.492
		117								114.082								0.571
		109								114.811								2.998

## Sheet: Figs. 4S-U
Figure 4 - Source Data
Amplitude [mV] (Panel S)								Paired-Pulse Ratio [a.u.] (Panel T)								Decay time constant [ms] (Panel U)
	eYFP	trkB.DN			eYFP	trkB.DN			eYFP	trkB.DN			eYFP	trkB.DN			eYFP	trkB.DN			eYFP	trkB.DN
	1.231	0.616		Number of neurons	10	8			0.75	0.846		Number of neurons	6	6			57.3164	104.167		Number of neurons	6	6
	1.401	2.049		Number of Mice	8	7			0.767	0.746		Number of Mice	5	6			63.4129	70.4152		Number of Mice	5	6
	0.215	0.679		Minimum	0.1818	0.5401			1.383	0.839		Minimum	0.7503	0.7465			34.73	54.3577		Minimum	33.8063	54.3577
	0.286	0.737		25% Percentile	0.2856	0.6478			1.137	0.894		25% Percentile	0.7673	0.7956			33.8063	128.623		25% Percentile	34.73	70.4152
	0.998	0.98		Median	0.7932	0.756			0.834	0.796		Median	0.8178	0.8425			86.3742	106.987		Median	60.3647	105.577
	0.802	0.775		75% Percentile	1.2312	1.5143			0.801	1.003		75% Percentile	1.1371	0.894			72.4684	178.133		75% Percentile	72.4684	128.623
	0.785	0.54		Maximum	1.4013	2.1205						Maximum	1.3832	1.0031						Maximum	86.3742	178.133
	0.341	2.12
	0.182			Mean	0.754	1.0621						Mean	0.9456	0.854						Mean	58.0181	107.114
	1.3			Std. Deviation	0.4732	0.6443						Std. Deviation	0.2574	0.0884						Std. Deviation	20.8376	43.9204
				Normal according to DAgostino & Pearson Test								Normal according to DAgostino & Pearson Test								Normal according to DAgostino & Pearson Test
				T - Test p-value:	0.2588							T - Test p-value:	0.4293							T - Test p-value:	0.0329
				t-stat:	-1.1709							t-stat:	0.8238							t-stat:	-2.4738
